# Supplementary material for: An Update on Prebiotics and on Their Health Effects
Source: MDPI journal article supplement (doi:10.3390/foods13030446), 2024-01-30
Supplement: s1 [file s1]

**Table S2A:** Effects of prebiotics in Colorectal Cancer

| Prebiotic                                                               | Effects                                                                                                                                                                                                                                                                                                                                        | Model  | Reference |
|-------------------------------------------------------------------------|------------------------------------------------------------------------------------------------------------------------------------------------------------------------------------------------------------------------------------------------------------------------------------------------------------------------------------------------|--------|-----------|
| Inulin and GOS                                                          | In situ production of SCFA<br>Significant increases of <i>Bifidobacterium</i> spp.                                                                                                                                                                                                                                                             | Animal | 10        |
| GOS                                                                     | Significant increase in beneficial populations, such as <i>Bifidobacterium</i> spp.;<br>56.9% increase in propionate production<br>Increase of Bacteroidetes and reduction of Firmicutes populations<br>Reduction of the genus <i>Desulfovibrio</i> spp.<br>Increase in the genus <i>Phascolarctobacterium</i>                                 | Animal | 12        |
| Inulin                                                                  | Increase in situ production of SCFA (propionic acid and butyric acid)<br>Increase of Bacteroidetes and Prevotellaceae<br>Reduction of the Firmicutes<br>Increase of the genus <i>Blautia</i><br>Increase in fecal mass<br>Reduction (49.9%) in the number of colon polyps                                                                      | Animal | 11        |
| COS                                                                     | Reduction of <i>Escherichia</i> spp., <i>Shigella</i> spp., <i>Enterococcus</i> spp. and <i>Turicibacter</i><br>Increase of <i>Akkermansia</i> spp., butyrate producing bacteria and <i>Cladosporium</i> spp.                                                                                                                                  | Animal | 13        |
| FOS (25%)<br>XOS (25%)<br>polydextrose (25%)<br>Resistant dextrin (25%) | Improvement of serum immunological indicators<br>Significant increase in levels of IgG and IgM, IgG, IgA, total B lymphocytes and T cells<br>Increased level of transferrin<br>Reduction of Bacteroidetes<br>Increase of <i>Bifidobacterium</i> spp. and <i>Enterococcus</i> spp.<br>Increase of harmless strains of <i>Escherichia</i> specie | Human  | 53        |
| FOS + <i>Bifidobacterium longum</i>                                     | Increased of SCFA in feces<br>Suppression of rotting bacteria in feces<br>Suppression of <i>Bacteroides fragilis</i> enterotoxin                                                                                                                                                                                                               | Human  | 14        |
| Acacia gum + <i>Lactiplantibacillus plantarum</i>                       | Reduction of TNF- $\alpha$ levels due to the anti-inflammatory activity of acacia gum<br>Reduction of $\beta$ -glucuronidase levels                                                                                                                                                                                                            | Animal | 15        |

|                                                                              |                                                                                                                                                                                                                                                                                                                                                                                                                                 |        |    |
|------------------------------------------------------------------------------|---------------------------------------------------------------------------------------------------------------------------------------------------------------------------------------------------------------------------------------------------------------------------------------------------------------------------------------------------------------------------------------------------------------------------------|--------|----|
| Yacon                                                                        | Improved intestinal permeability<br>Increased production of epithelial mucus<br>Increased antioxidant activity<br>Reduction of TNF<br>Increased SCFA levels<br>Increased production of antibacterial defensins and anti-inflammatory cytokines, mainly IL-10                                                                                                                                                                    | Animal | 16 |
| Jabuticaba seeds + <i>Lactobacillus delbrueckii</i> subsp. <i>bulgaricus</i> | Increase of Bacteroidetes<br>Reduction of Firmicutes<br>Reduction of $\beta$ -glucoronidase, $\beta$ -glucosidase, galactosidase, mucinase and nitroreductase (bacterial metabolizing enzymes), and consequent reduction in the incidence of colon cancer<br>Growth inhibition of <i>Bacteroides</i> , <i>Clostridium</i> and <i>Propionibacterium</i> spp.<br>Increase of <i>Lactobacillus</i> and <i>Bifidobacterium</i> spp. | Animal | 17 |
| JP                                                                           | Significant decrease in Firmicutes/Bacteroidetes ratio<br>Strong activity in the regulation of dysbiosis and maintenance of microbial balance<br>Increased SCFA production                                                                                                                                                                                                                                                      | Animal | 18 |
| NVPS                                                                         | Reduction in the number and size of tumors<br>Reduction in the incidence of CRC<br>Reduced Firmicutes/Bacteroidetes ratio<br>Increase in SCFA producing genera, including butyric producers ( <i>Butyricicoccus</i> , <i>Butyrivibrio</i> and <i>Butyricimonas</i> ) and acetic acid ( <i>Lachnospiraceae</i> UCG 001, <i>Lachnospiraceae</i> UCG 006 and <i>Blautia</i> )                                                      | Animal | 19 |
| Dextran                                                                      | Production of SCFA with an anti-inflammatory action                                                                                                                                                                                                                                                                                                                                                                             | Animal | 20 |

**Table S2B:** Effects of prebiotics in neurovegetative diseases and cognitive functions

| Prebiotic                                                                  | Effects                                                                                                                                                                                                                                                                                                                               | Model                                                             | Reference |
|----------------------------------------------------------------------------|---------------------------------------------------------------------------------------------------------------------------------------------------------------------------------------------------------------------------------------------------------------------------------------------------------------------------------------|-------------------------------------------------------------------|-----------|
| <b>Cognitive Functions</b>                                                 |                                                                                                                                                                                                                                                                                                                                       |                                                                   |           |
| Inulin + <i>Bifidobacterium animalis</i> subsp. <i>lactis</i>              | Improvements in scores of the neurocognitive index domain (overall cognitive function, overall attention, cognitive flexibility, and executive functions)<br>Reduction of some inflammation markers                                                                                                                                   | Human                                                             | 23        |
| Polydextrose                                                               | Better performances in sustained attention<br>Increased abundance of <i>Ruminoclostridium</i> 5                                                                                                                                                                                                                                       | Human                                                             | 24        |
| <b>Stress</b>                                                              |                                                                                                                                                                                                                                                                                                                                       |                                                                   |           |
| Prebiotic fruits and vegetables, fermented foods                           | Improvement of perceived stress in adults                                                                                                                                                                                                                                                                                             | Human                                                             | 21        |
| FOS and GOS                                                                | Increase of <i>Bifidobacterium</i> spp.<br>No clear effect on the markers of stress and inflammation                                                                                                                                                                                                                                  | Human                                                             | 22        |
| <b>Anxiety and Depression</b>                                              |                                                                                                                                                                                                                                                                                                                                       |                                                                   |           |
| ALAC+ sodium butyrate                                                      | Relieve the symptoms of anxiety<br>Reduction of intestinal inflammation<br>Reduction of the immobility time<br>Increased preference of sucrose, thereby reducing anhedonia.                                                                                                                                                           | Animal                                                            | 25        |
| Galactosylsucrose                                                          | Improvement of self-efficacy for patients with depression                                                                                                                                                                                                                                                                             | Human                                                             | 26        |
| <b>Autism</b>                                                              |                                                                                                                                                                                                                                                                                                                                       |                                                                   |           |
| GOS + <i>Limosilactobacillus reuteri</i> and <i>Bifidobacterium longum</i> | Increased survival of probiotics<br>Increased levels of Firmicutes, <i>Akkermansia</i> , <i>Blautia</i> and <i>Actinobacter</i><br>Reduction of Bacteroides and Verrucomicrobia<br>Increased concentrations of SCFA<br>Reduction of constipation, diarrhea and pain<br>Improvement in terms of lethargy, irritability and stereotypes | In vitro fermentation model: SHIME (Simulator of Human Intestinal | 27        |

|                                                             |                                                                                                                                                                                                                                                               |                      |    |
|-------------------------------------------------------------|---------------------------------------------------------------------------------------------------------------------------------------------------------------------------------------------------------------------------------------------------------------|----------------------|----|
|                                                             |                                                                                                                                                                                                                                                               | Microbial Ecosystem) |    |
| B-GOS                                                       | Increased amounts of creatinine, creatine, dimethyl-cine, dimethylanine, carnitine, citrate, adipate and trimethylamine-N-oxide in children's urine with ASD<br>Reduction of amino acid and lactate levels<br>Improvement of abdominal pain                   | Human                | 28 |
| B-GOS                                                       | Significant increase of bifidobacteria, <i>Rosburia</i> , <i>Bacteroides</i> , <i>Atopobium</i> , <i>Faecalibacterium prausnitzii</i> , <i>Sutterella</i> spp.; rectal <i>Eubacterium</i><br>Reduction of Veillonellaceae<br>Increased of acetate and lactate | Human                | 29 |
| B-GOS combined with a casein and gluten free diet           | Improvement in sociality and behavioural traits<br>Increased of <i>Faecalibacterium prausnitzii</i> and <i>Bacteroides</i> spp.                                                                                                                               | Human                | 30 |
| ALAC+ sodium butyrate                                       | Improvement of sociability and memory<br>Reduction of intestinal inflammation<br>Increased mobility<br>Reduction of repetitive behavior                                                                                                                       | Animal               | 25 |
| Inulin + oligofructose                                      | Improvement of intestinal permeability<br>Improvement of the behavioral field (reduction of repetitive behaviors)                                                                                                                                             | Animal               | 95 |
| <b>Schizophrenia</b>                                        |                                                                                                                                                                                                                                                               |                      |    |
| Green leafy vegetables, high-fibre fruit, whole grains      | Improvement of cardio-metabolic profile in schizophrenia spectrum disorders                                                                                                                                                                                   | Human                | 31 |
| <b>Parkinson</b>                                            |                                                                                                                                                                                                                                                               |                      |    |
| Inulin, resistant starch, resistant maltodextrin, rice bran | Beneficial biological changes in the microbiota, SCFA, inflammation, and neurofilament light chain<br>Reduction of the markers of inflammation (plasma zonulin and stool calprotectin)                                                                        | Human                | 32 |

**Table S2C:** Effects of prebiotics in intestinal diseases

| Prebiotic                             | Effects                                                                                                                                                           | Model  | Reference |
|---------------------------------------|-------------------------------------------------------------------------------------------------------------------------------------------------------------------|--------|-----------|
| <b>Inflammatory Bowel Disease</b>     |                                                                                                                                                                   |        |           |
| Inulin                                | Increased level of indigenous lactobacilli;<br>Reduction of the pH of the colon;<br>Reduction of the mucosal inflammation and lower scores of histological damage | Animal | 33        |
| Inulin + FOS                          | Reduction in intestinal inflammation<br>Increased levels of intestinal bifidobacteria and lactobacilli;<br>Decrease in mucosal proinflammatory cytokines          | Animal | 34        |
| Resveratrol                           | Increased levels of <i>Bifidobacterium</i> and <i>Lactobacillus</i><br>Lower amounts of <i>E. coli</i> and Enterobacteriaceae                                     | Animal | 35        |
| Inulin + FOS + <i>Bifidobacterium</i> | Reduction in intestinal inflammation and in the intestinal TNF and IL-1a levels                                                                                   | Human  | 36        |
| fructans of inulin type               | Increase in colon butyrate production and improvement of colitis                                                                                                  | Human  | 37        |
| Inulin + FOS                          | Improved clinical symptoms and increased level of <i>Bifidobacterium</i>                                                                                          | Human  | 38        |
| FOS                                   | Reduction of the HBI score<br>Increased fecal <i>Bifidobacterium</i> concentrations<br>Increase of the percentage of IL-10–positive DCs.                          | Human  | 39        |
| <b>Irritable Bowel Disease</b>        |                                                                                                                                                                   |        |           |
| scFOS                                 | Reduction of anxiety scores<br>Increase of Bifidobacteria population                                                                                              | Human  | 42        |
| GOS                                   | Increase in the number of Bifidobacteria<br>relief of flatulence, abdominal pain, and discomfort symptoms                                                         | Human  | 44        |
| <b>Enteric Syndrome</b>               |                                                                                                                                                                   |        |           |

|                                        |                                                                                                                                                                                                                                        |        |    |
|----------------------------------------|----------------------------------------------------------------------------------------------------------------------------------------------------------------------------------------------------------------------------------------|--------|----|
| GOS + Bifidobacteriaceae               | Intestinal increase of bifidobacterial and lactic acid bacteria<br>Improved renal function                                                                                                                                             | Animal | 47 |
| EPS + <i>Leuconostoc mesenteroides</i> | Growth stimulation of bifidobacteria, <i>Lactobacillus</i> spp. and SCFA<br>Increase in antioxidant activity<br>Stimulation of antioxidant activity<br>Improvement of skin immunity                                                    | Animal | 48 |
| Inulin + <i>Lactobacillus casei</i>    | Increase in basophils and lactobacilli concentration<br>Reduction of total coliform concentration in faeces<br>Reduction of diarrheal phenomena<br>Increased consistency of the faeces<br>Reduction of serum cholesterol concentration | Animal | 46 |
| Catechins                              | Increase of <i>Lactobacillus</i> spp., <i>Bifidobacterium</i> spp., <i>Akkermansia</i> spp., <i>Roseburia</i> spp. and <i>Faecalibacterium</i> spp.<br>Increased production of SCFA                                                    | Animal | 45 |

**Table S2D:** Effects of prebiotics in Obesity

| Prebiotic                                                                                | Effects                                                                                                                                                                                                                                                                                                                         | Model  | Reference |
|------------------------------------------------------------------------------------------|---------------------------------------------------------------------------------------------------------------------------------------------------------------------------------------------------------------------------------------------------------------------------------------------------------------------------------|--------|-----------|
| COS                                                                                      | Increased level of acetic acid, with reduction of propionic and butyric acid; <i>Bacteroides</i> increase in microbiota and reduction of Proteobacteria and Actinobacteria                                                                                                                                                      | Animal | 49        |
| FOS/GOS                                                                                  | Improvement of the microbiota dysbiosis<br>Increased inflammatory cytokines                                                                                                                                                                                                                                                     | Animal | 50        |
| Flavanols: epi-gallocatechin, epigallocatechin gallate, epicatechin, epicatechin gallate | Increase of <i>Akkermansia</i> , <i>Roseburia</i> and <i>Bifidobacterium</i><br>Increased production of butyrate<br>Improvement of intestinal barrier function<br>Reduction of the Firmicutes/Bacteroidetes ratio<br>Reduction of translocation of endotoxins                                                                   | Animal | 51        |
| Decaffeinated Green and Black Tea (GT and BT) polyphenols                                | Inhibition of weight gain in mice fed a high-fat diet<br>Firmicutes/Bacteroidetes ratio reduction<br>$\alpha$ -amylase and $\alpha$ -glucosidase inhibition in saliva and small intestine<br>Increased SCFA (acetate and propionate)                                                                                            | Animal | 52        |
| Aqueous extracts of tea                                                                  | <i>Firmicutes</i> increase and decrease of Bacteroidetes<br>Potential growth of <i>Akkermansia muciniphila</i>                                                                                                                                                                                                                  | Animal | 53        |
| Marc and cinnamon extracts                                                               | Improvement of blood sugar<br>Reduction of fat mass increase<br>Enrichment in Firmicutes<br>Decrease in <i>Bacteroides</i><br>Reduction of hepatic steatosis                                                                                                                                                                    | Animal | 54        |
| Inulin                                                                                   | Increase of actinobacteria<br>Reduction of Clostridia<br>Reduction of girmicutes ( <i>B. obeum</i> , <i>E. ruminantium</i> , <i>B. obeum</i> , <i>B. luti</i> , <i>B. faecis</i> , <i>R. faecis</i> , <i>Oscillibacter</i> spp.)<br>Growth stimulus of <i>Bacteroides</i> spp. ( <i>B. uniformis</i> , <i>B. xilansolveni</i> ) | Animal | 55        |
| Vanillin and lignans                                                                     | Reduction of Firmicutes<br>Increase of Bacteroidetes and Verrucomicrobia<br>Inhibition of lipopolysaccharide producing bacteria (LPS)<br>Improved sensitivity to insulin                                                                                                                                                        | Animal | 56        |

|                                      |                                                                                                                                                                                                                                                                                  |        |    |
|--------------------------------------|----------------------------------------------------------------------------------------------------------------------------------------------------------------------------------------------------------------------------------------------------------------------------------|--------|----|
|                                      | Stimulation of SCFA production                                                                                                                                                                                                                                                   |        |    |
| Cranberry extract                    | Reduction of intestinal triglyceride content<br>Relief of intestinal inflammation and oxidative stress<br>Increase of <i>Akkermansia</i> spp.<br>Reduction of the weight gain                                                                                                    | Animal | 58 |
| Apple Procyanidins                   | Increase of <i>Akkermansia muciniphila</i><br>Improved sensitivity to insulin<br>Improvement in lipid catabolism                                                                                                                                                                 | Animal | 59 |
| Resveratrol                          | Increase of <i>Lactobacillus</i> spp., <i>Akkermansia muciniphila</i> and <i>Bifidobacterium</i> spp.<br>Improved sensitivity to insulin                                                                                                                                         | Animal | 60 |
| Pterostilbene                        | Increase of <i>Akkermansia muciniphila</i><br>Improved sensitivity to insulin<br>Increased production of butyrate and propionate                                                                                                                                                 | Animal | 61 |
| Catechins                            | Increase of <i>Roseburia</i> spp., <i>Lactobacillus</i> spp., <i>Bifidobacterium</i> spp. <i>Akkermansia</i> spp. <i>Faecalibacterium</i> spp.                                                                                                                                   | Animal | 45 |
| Inulin-type fructans (ITF)           | Growth stimulation of Bifidobacteria and <i>Faecalibacterium prausnitzii</i><br>Reduction of <i>Bacteroides intestinalis</i> and <i>Bacteroides vulgatus</i>                                                                                                                     | Human  | 62 |
| Soy isoflavones                      | Increase of <i>Faecalibacterium</i><br>Reduction in blood lipid levels<br>Improved immune function and intestinal permeability<br>Attenuation of oxidative damage<br>Increased fraction of beneficial bacteria producing SCFA ( <i>Bacteroidetes</i> and <i>Proteobacteria</i> ) | Animal | 66 |
| Pomegranate extract                  | Increase of <i>Bacteroides</i> , <i>Faecalibacterium</i> , <i>Butyricicoccus</i> , <i>Odoribacter</i> and <i>Butyricimonas</i><br>Reduction of <i>Parvimonas</i> , <i>Methanobrevibacter</i> and <i>Methanosphaera</i>                                                           | Animal | 67 |
| Pomegranate extract + syringaresinol | Reduction of serum LBP, therefore polyphenols could modulate metabolic endotoxaemia                                                                                                                                                                                              | Animal | 68 |
| Arctic berries                       | Relief of intestinal inflammation induced by a high-fat diet<br>Reduction of hepatic steatosis<br>Prevention of hyperinsulinemia                                                                                                                                                 | Animal | 58 |



|                                                                                                                                                                 |                                                                                                                                                 |        |    |
|-----------------------------------------------------------------------------------------------------------------------------------------------------------------|-------------------------------------------------------------------------------------------------------------------------------------------------|--------|----|
| Pollen extract                                                                                                                                                  | Reduction of lipid accumulation in serum and liver<br>Reduction of oxidative damage and inflammation<br>Increase of <i>Bifidobacterium</i> spp. | Animal | 70 |
| Genistein                                                                                                                                                       | Reduction of weight gain<br>Reduction of serum triglycerides<br>Improvement of the glucose tolerance                                            | Animal | 71 |
| Chicory inulin combined with a probiotic mixture (20 billion CFU; lactobacilli, bifidobacteria, <i>Bacillus</i> , <i>Streptococcus</i> , <i>Saccharomyces</i> ) | Reduction of BMI, body weight, and waist and hip circumferences<br>Reduced subclinical inflammation related to immunity                         | Human  | 65 |
| Inulin-type fructan                                                                                                                                             | Increase in <i>Bifidobacterium</i> content<br>Reduction of fecal calprotectin<br>Increase of rumenic and conjugated linolenic acid              | Human  | 63 |
| Galacto-mannans combined with <i>Bacillus coagulans</i>                                                                                                         | Higher weight loss in patient of bariatric surgery<br>Significant decrease of plasma triglycerides                                              | Human  | 73 |
| <i>Bifidobacterium animalis</i> subsp. <i>lactis</i> and FOS                                                                                                    | Changes in serum metabolite profile related to a decrease in inflammation                                                                       | Human  | 64 |
| FOS, yeast $\beta$ -glucans, silymarin extract                                                                                                                  | Reduction of cortisol with effect on sleep quality                                                                                              | Human  | 72 |
| Resistant dextrin                                                                                                                                               | Modification of satiety and glycaemic responses                                                                                                 | Human  | 96 |

**Table S2E:** Effects of prebiotics in type-2 Diabetes and Metabolic Syndrome

| Prebiotic                          | Effects                                                                                                                                                                                                           | Model  | Reference |
|------------------------------------|-------------------------------------------------------------------------------------------------------------------------------------------------------------------------------------------------------------------|--------|-----------|
| <b>Diabetes</b>                    |                                                                                                                                                                                                                   |        |           |
| COS                                | Reduction of hyperglycemia, hyperlipidemia<br>Prevention of obesity<br>Histological improvement in the liver of T2DM mice<br>Increased of Firmicutes, Bacteroidetes and Proteobacteria                            | Animal | 74        |
| COS                                | Reduction of BGL in diabetic mice;<br>Increase of Actinobacteria, Lachnospiraceae and Corynebacteriaceae populations                                                                                              | Animal | 75        |
| ITF + <i>Lactobacillus</i> spp.    | Reduction of BGL<br>Reduction of FBG<br>Reduction of the Firmicutes/Bacteroidetes ratio<br>Increased of <i>Lactobacillus</i> spp., <i>Bacteroides</i> , <i>Phascolarctobacterium</i> and <i>Lachnoclostridium</i> | Animal | 76        |
| ITF                                | Increase in the intestinal level of Bifidobacteria<br>Increased concentration of acetic and propionic acids<br>Decrease of <i>Firmicutes</i><br>Slight increase of <i>F. prausnitzii</i>                          | Human  | 77        |
| Resistant Dextrin and maltodextrin | Resistant dextrin improves sleep and QOL in obese women with type 2 diabetes<br>Modulation of glycemia, metabolic endotoxemia and subsequently a decrease in biomarkers of inflammation and HPA axis activity     | Human  | 79        |
| Inulin-type fructans               | Improvement incretin responses or glucose regulations                                                                                                                                                             | Human  | 97        |
| Commercial prebiotic formula       | Modulation of gut microbiota                                                                                                                                                                                      |        | 80        |
| <b>Metabolic Syndrome</b>          |                                                                                                                                                                                                                   |        |           |
| NACOS                              | Promotion of insulin synthesis<br>Improved glucose tolerance                                                                                                                                                      | Animal | 81        |

|                                                                        |                                                                                                                                                                                                                                           |        |    |
|------------------------------------------------------------------------|-------------------------------------------------------------------------------------------------------------------------------------------------------------------------------------------------------------------------------------------|--------|----|
| NACOS                                                                  | Inhibition of lipid accumulation in the liver<br>Reduction of the Firmicutes/Bacteroidetes ratio<br>Reduction of <i>Desulfovibrio</i> spp.<br>Reduction of fasting blood sugar<br>Increase of the <i>Lactobacillus/Enterococcus</i> ratio |        | 82 |
| Pro-anthocyanidins from grape seeds                                    | Reduction of cecal butyrate<br>Increase of <i>Bacteroides</i> and Proteobacteria<br>Decrease in Firmicutes<br>Significant increase of <i>Akkermansia muciniphila</i>                                                                      | Animal | 83 |
| Pomegranate extract                                                    | Modulation of gut microbiota, depending also on the pharmacological therapy<br>Reduction of lipopolysaccharide-binding protein                                                                                                            | Human  | 84 |
| Inulin, inulin+traditional Chinese medicine (TCM), or inulin+metformin | Inulin alone or combined with metformin or TCM altered specific gut microbiota taxa but not the general diversity<br>Correlation of microbiota with lipids, uric acid, and glucose, with possible effects on MetS                         | Human  | 98 |

**Table S2F:** Effects of prebiotics in Osteoporosis and Immunity

| Prebiotic                                                    | Effects                                                                                                                                                                                                                                                                                                                                                                                                           | Model  | Reference |
|--------------------------------------------------------------|-------------------------------------------------------------------------------------------------------------------------------------------------------------------------------------------------------------------------------------------------------------------------------------------------------------------------------------------------------------------------------------------------------------------|--------|-----------|
| <b>Osteoporosis</b>                                          |                                                                                                                                                                                                                                                                                                                                                                                                                   |        |           |
| FOS                                                          | Increase in bone mass<br>Increase of butyrate concentration in the colon                                                                                                                                                                                                                                                                                                                                          | Animal | 85        |
| FOS/GOS                                                      | Improved calcium, phosphorus and magnesium absorption<br>Reduction of bone loss in ovariectomy-induced rats                                                                                                                                                                                                                                                                                                       | Animal | 86        |
| FOS and dried prunes                                         | Improvement of bone mineral density<br>Improvement in bone recovery                                                                                                                                                                                                                                                                                                                                               | Animal | 87        |
| FOS                                                          | Increased <i>Lactobacillus</i> and <i>Bacteroides</i> population<br>Increased calcium content in the femoral bone<br>Decrease of the level of urinary deoxypyridinoline and serum high-sensitivity C-reactive proteins.                                                                                                                                                                                           | Animal | 88        |
| Soluble corn fiber                                           | Variable impact on calcium absorption in pre-menopausal women due probably to gut microbiota alteration                                                                                                                                                                                                                                                                                                           | Human  | 89        |
| Soluble corn fiber, with and without calcium supplementation | Increase bone density after 6 months in preadolescent                                                                                                                                                                                                                                                                                                                                                             | Human  | 90        |
| <b>Immunity</b>                                              |                                                                                                                                                                                                                                                                                                                                                                                                                   |        |           |
| Syngaresinol                                                 | Reduction of the Firmicutes/Bacteroidetes ratio<br>Increase of <i>Lactobacillus</i> and <i>Bifidobacterium</i> spp.<br>Reduction of <i>Akkermansia</i> spp.;<br>Reduction of serum level of LPS binding protein<br>Improvement of humoral immunity                                                                                                                                                                | Animal | 91        |
| B-GOS                                                        | Significant increase in <i>Bifidobacteria</i> , <i>Lactobacillus</i> spp., <i>C. coccoides</i> , <i>Enterococcus</i> spp.<br>Significant increases in phagocytosis and production of anti-inflammatory cytokine interleukin-10 (IL-10)<br>Significant reduction in the production of proinflammatory cytokines (IL-6, IL-1 $\beta$ and tumor necrosis factor $\alpha$ )<br>Reduction of <i>Desulfovibrio</i> spp. | Human  | 92        |

|                |                                             |       |    |
|----------------|---------------------------------------------|-------|----|
| Chicory inulin | Increase in the <i>Bifidobacterium</i> spp. | Human | 93 |
| GOS and FOS    | Increased in bifidobacteria and butyrate    | Human | 94 |

#### List of abbreviations

1. **ADHD** = Attention Deficit Hyperactivity Disorder;
2. **ADOS-CSS** (Autism Diagnostic Observation Schedule – Calibrated Severity Score) = standard assessment tool in autism research;
3. **AN** = Anorexia Nervosa;
4. **ATEC** = Autism Treatment Evaluation Checklist;
5. **BDI** (Beck Depression Inventory) = depression assessment tool;
6. **BDNF** = brain-derived neurotrophic factor;
7. **BGL** = blood glucose levels;
8. **BMI** = Body Mass Index;
9. **CD** = Crohn's disease;
10. **CRP** = C-reactive protein;
11. **DCA** = secondary bile acid deoxycholic acid;
12. **DCs** = dendritic cells;
13. **FBG** = fasting blood glucose;
14. **FOS** = fructo-oligosaccharides;
15. **FPG** = fasting plasma glucose;
16. **FST** (Forced Swim Test) = rodent depression assessment test;
17. **GABA** = gamma-aminobutyric acid;
18. **HDL** = High Density Lipoprotein;
19. **IBS** = Irritable Bowel Disease;
20. **IBS-SSS** = Irritable Bowel Disease-Severity Scoring System;
21. **IL** = interleukin;
22. **ISI** = insulin sensitivity index;
23. **KYN** = Kynurenine
24. **LBP** = Lipopolysaccharide Binding Protein
25. **LDL** = low density lipoproteins;
26. **LPS** = lipopolysaccharide,
27. **MDS-UPDRS** (Movement Disorder Society-Unified Parkinson's Disease Rating Scale) = Parkinson's disease rating scale.
28. **Mice db/db** = mice homozygous for a defect in the leptin receptor;
29. **MMSE** (Mini mental State Examination) = cognitive status assessment tool;
30. **QOL** = Sleep quality and quality of life
31. **SCFA** = Short Chain Fatty Acids;
32. **scFOS** = short chain Fructo-oligosaccharide
33. **SNAP-IV** = ADHD assessment test;
34. **SNC** = Sympathetic nervous system;

- 35. **TNF** = Tumor Necrosis Factor;
- 36. **TRP** = Tryptophan;
- 37. **UC** = Ulcerative colitis.
