# Supplementary material for: An Update on Prebiotics and on Their Health Effects
Source: Foods. 2024 Jan 30;13(3):446. doi: 10.3390/foods13030446 (PMC10855651; doi:10.3390/foods13030446)
Supplement: Supplementary file 1 [file foods-13-00446-s001.zip › Supplementary material table S1.xlsx]

## Sheet: Sheet1
Label	Occurrences	Label	Occurrences	Label	Occurrences	Label	Occurrences	Label	Occurrences
CLUSTER 1		CLUSTER 2		CLUSTER 3		CLUSTER 4		CLUSTER 5
279 items		226 items		215 items		175 items		104 items
4 aminobutyric acid	11	adaptive immunity	17	alginic acid	16	acetic acid	64	adipocyte	9
abdominal pain	19	alanine aminotransferase	28	amino acids	19	actinobacteria	60	adiponectin	11
adjuvant therapy	10	albumin	11	amylase	23	akkermansia	29	adipose tissue	17
adolescent	18	alkaline phosphatase	17	anthocyanin	23	akkermansia muciniphila	34	adverse event	35
adult	158	amino acid	26	anti-inflammatory agents	15	amino acid metabolism	17	animal model	94
age	12	ampicillin	14	antiinflammatory agent	22	amplicon	11	antidiabetic activity	21
aged	46	animal	324	antimicrobial	11	antineoplastic agent	14	antiobesity activity	15
aging	36	animal cell	34	antineoplastic activity	30	area under the curve	9	atherosclerosis	17
alcohol	14	animal experiment	170	antioxidant	103	arginine	11	beta-glucans	10
allergy	17	animal feed	50	antioxidant activity	98	article	462	bile acid	37
alpha tocopherol	28	animal food	79	antioxidants	73	bacterial dna	14	bile acid metabolism	10
alzheimer disease	33	animal health	16	arabinose	13	bacterial genome	9	bile acids and salts	11
anthropometry	10	animal nutritional physiological phenomena	10	arabinoxylan	14	bacterial metabolism	11	blood glucose	13
antibiotic therapy	25	animal tissue	100	bacilli	11	bacterial strain	45	body weight loss	16
anxiety	26	animals	325	bacillus	13	bacterium	107	c57bl mouse	51
anxiety disorder	10	anti-bacterial agents	37	bacteria	148	bacterium culture	24	carbohydrate diet	12
artificial milk	21	antibacterial activity	34	bacteriology	10	bacterium identification	11	carbohydrate intake	10
ascorbic acid	31	antibiotic agent	87	beneficial effects	18	bacteroidaceae	18	cardiovascular diseases	22
asthma	19	antibiotic resistance	34	beverage	18	bacteroidales	10	cholesterol	62
atopic dermatitis	22	antibiotics	29	beverages	16	bacteroides	98	cholesterol blood level	31
autism	23	antiinfective agent	55	bifidobacteria	17	bacteroides fragilis	15	diabetes	24
bacillus coagulans	15	antiinflammatory activity	62	bifidobacterium animalis	25	bacteroidetes	103	diabetes mellitus, type 2	30
bifidobacterium bifidum	38	antimicrobial activity	49	bioactive compounds	35	bifidobacteriaceae	21	diet, high-fat	40
bifidobacterium breve	21	antiviral activity	14	bioactivity	30	bifidobacterium	213	diet-induced obesity	12
bifidobacterium longum	43	apoptosis	42	bioavailability	20	biofilm	32	dietary carbohydrates	10
bifidobacterium longum subsp. infantis	19	aquaculture	30	biochemistry	21	bioinformatics	23	disease model	11
biological marker	34	arabinogalactan	11	biological activity	36	blautia	29	disease models, animal	10
biomarkers	18	aspartate aminotransferase	24	biomolecules	13	breast cancer	13	drug effect	136
biotransformation	15	bacillus subtilis	34	biosynthesis	30	butyrate	11	dyslipidemia	24
bloating	17	bacterial colonization	33	biotechnology	11	butyrates	11	endotoxemia	15
blood brain barrier	12	bacterial count	13	blood	24	butyric acid	85	endotoxin	15
body mass	57	bacterial growth	63	blood pressure	14	butyric acid derivative	11	energy expenditure	10
bone	10	bacterial infection	15	caco-2 cell line	16	cancer	22	energy metabolism	16
bone density	16	bacteriocin	19	caco-2 cells	12	cancer chemotherapy	13	farnesoid x receptor	11
bovine	13	bacteriophage	16	carbohydrate	50	cancer growth	11	fat mass	12
brain	26	beta glucan	39	carbohydrates	12	cancer immunotherapy	13	fatty acid	30
brain derived neurotrophic factor	13	biochemical analysis	19	carbon source	10	cancer therapy	11	fatty liver	14
brain function	10	blood sampling	17	catechin	11	carbohydrate metabolism	21	fiber	14
brain-gut axis	34	body composition	21	cellulose	26	carcinogenesis	16	gastrointestinal microbiome	369
breast feeding	18	body weight	72	chemical composition	29	chemotherapy	10	glucose	99
breast milk	43	body weight gain	50	chemical structure	15	classification	21	glucose blood level	63
c reactive protein	32	broiler	40	chemistry	122	clostridia	20	glucose homeostasis	17
calcium	23	broilers	13	colitis	22	clostridiaceae	13	glucose metabolism	23
calcium intake	10	campylobacter jejuni	11	colon	29	clostridiales	16	glucose tolerance	10
calgranulin	11	carboxylic acid	23	colon flora	13	clostridioides difficile	13	glucose tolerance test	9
caloric intake	30	carcass	11	dairies	15	clostridium	42	glycemic control	22
caloric restriction	14	carotenoid	19	dairy products	10	coculture	13	hemoglobin a1c	11
cardiovascular disease	65	catalase	13	degree of polymerization	10	colon cancer	21	high density lipoprotein	9
cardiovascular risk	11	cd4+ t lymphocyte	17	dietary fiber	158	colorectal cancer	31	high density lipoprotein cholesterol	37
cattle	13	cecum	17	dietary fibre	42	commensal	12	high-fat-diet	10
celiac disease	13	cell differentiation	12	digestion	69	comparative study	28	homeostasis model assessment	12
central nervous system	12	cell proliferation	39	digestive system	21	controlled study	334	hyperglycemia	21
cerebrovascular accident	9	cell viability	19	diseases	34	coprococcus	9	hyperlipidemia	17
cesarean section	11	chemokine	10	dpph radical scavenging assay	11	crohn disease	13	insulin	40
child	47	chicken	29	drug	9	cyanobacterium	10	insulin blood level	15
child health	10	chickens	31	drug delivery system	14	cyclophosphamide	11	insulin resistance	64
children	13	chitosan	20	drug structure	10	defecation	10	insulin sensitivity	27
chronic disease	15	chronic inflammation	11	encapsulation	12	discriminant analysis	9	intestine function	41
chronic kidney failure	20	claudin 1	13	enzymatic hydrolysis	13	dna 16s	17	leptin	17
clinical article	24	clostridium butyricum	14	enzyme	11	dna extraction	61	linoleic acid	9
clinical effectiveness	17	clostridium perfringens	14	enzyme inhibition	13	dna sequencing	14	lipid	51
clinical feature	9	colony forming unit	34	enzymes	16	dog	14	lipid diet	63
clinical outcome	20	copper	12	exopolysaccharide	14	dogs	11	lipid fingerprinting	16
clinical trial	30	cyclooxygenase 2	11	extraction	21	enterobacteriaceae	26	lipid metabolism	62
clinical trial (topic)	13	cytokine	40	fatty acids	61	enterococcus	29	lipid storage	21
clostridium difficile infection	14	cytokine production	20	fatty acids, volatile	72	enterococcus faecalis	19	lipids	20
cochrane library	9	cytokine release	12	fermentation	188	escherichia	16	lipolysis	9
cognition	32	cytokines	21	fermented foods	10	eubacterium	19	liver	30
cognitive defect	20	cytotoxicity	12	fibers	10	faecalibacterium	53	liver injury	12
cohort analysis	11	diet supplementation	154	flavonoids	23	faecalibacterium prausnitzii	22	low density lipoprotein	13
complication	31	digestibility	10	food	23	fatty acid synthesis	15	low density lipoprotein cholesterol	42
constipation	38	disease resistance	20	food additives	19	feces	89	low grade inflammation	9
coronavirus disease 2019	29	dna damage	18	food industries	18	feces analysis	58	male	244
covid-19	30	docosahexaenoic acid	22	food industry	37	feces microflora	92	metabolic diseases	17
creatinine	14	down regulation	25	food microbiology	13	firmicutes	110	metabolic disorder	45
cross-sectional study	12	drinking water	10	food processing	17	flow cytometry	11	metabolic disorders	10
crossover procedure	11	drug formulation	11	food safety	16	fructose oligosaccharide	79	metabolic parameters	12
curcumin	24	drug mechanism	22	fourier transform infrared spectroscopy	12	fusobacteria	15	metabolic regulation	12
dairy product	10	ecosystem	11	freeze drying	10	fusobacterium	10	metabolic syndrome	30
degenerative disease	18	egg production	12	fructan	31	fusobacterium nucleatum	11	metabolic syndrome x	46
depression	48	enteritis	23	fructans	24	gas chromatography	21	metformin	17
diabetes mellitus	55	enterococcus faecium	23	fructo-oligosaccharides	23	gene sequence	37	mice	104
diarrhea	52	enzyme activity	58	fructooligosaccharides	21	genetics	83	mice, inbred c57bl	51
diet	171	enzyme linked immunosorbent assay	20	fructose	20	genomic dna	13	mouse	144
diet therapy	60	epithelium cell	12	fruit	26	glycosidase	9	non insulin dependent diabetes mellitus	72
dietary intake	58	escherichia coli	100	fruits	21	gut microbiome	73	non-alcoholic fatty liver disease	23
dietary supplement	126	essential oil	15	fucose	9	helicobacter pylori	18	nonalcoholic fatty liver	33
dietary supplements	109	feed additives	19	functional food	90	high performance liquid chromatography	36	obesity	174
disease association	15	feed conversion ratio	18	functional foods	37	high throughput sequencing	30	oral glucose tolerance test	10
disease exacerbation	14	feeding	23	fungi	12	host microbe interaction	13	pharmacology	32
disease severity	17	fish	15	galacto-oligosaccharides	14	human experiment	19	protein blood level	14
double blind procedure	39	flavonoid	51	galactose	25	immunotherapy	13	rat	52
double-blind method	22	food additive	31	gallic acid	15	in vitro	11	rats	36
drug efficacy	41	food intake	81	glucan	14	intestine flora	679	rats, wistar	13
drug megadose	14	fucoidin	14	glucans	11	kegg	10	regulatory mechanism	13
drug safety	19	g protein coupled receptor	14	glucuronic acid	11	klebsiella pneumoniae	13	symbiosis	17
dysbiosis	216	gallus gallus	17	glycosylation	16	lachnospiraceae	48	triacylglycerol	64
eczema	10	gamma interferon	25	gut health	53	lactobacillaceae	13	triacylglycerol blood level	15
embase	11	gastrointestinal tract	90	gut healths	14	lactobacillales	15	trimethylamine oxide	11
enteropathy	14	gene expression	99	gut microbiota	384	lactobacillus	195	type 2 diabetes	10
environmental exposure	11	genotype	10	health	98	lactobacillus gasseri	11	type 2 diabetes mellitus	10
environmental factor	21	glutathione	26	health benefits	49	lactobacillus reuteri	19	waist circumference	13
epigallocatechin gallate	14	glutathione peroxidase	23	health effects	16	lactulose	27	whole grain	10
epigenetics	13	glycolysis	14	health promotion	18	liquid chromatography-mass spectrometry	27	wistar rat	16
evidence based practice	11	growth	42	health risks	11	lithocholic acid	10
exercise	23	growth performance	29	hemicellulose	15	mass fragmentography	17	CLUSTER 6
fat intake	16	growth promotor	10	human health	38	mass spectrometry	24	gut	17
fatigue	10	growth rate	22	human milk oligosaccharides	20	metabolite	54
fecal microbiota transplantation	96	growth, development and aging	24	hydrolysis	29	metabolome	24
female	222	health status	36	hypercholesterolemia	10	metabolomics	60
fermented dairy product	11	heat stress	12	in vitro digestion	14	metagenome	21
fermented product	21	hematological parameters	15	in vitro fermentation	17	metagenomics	61
fiber intake	18	hemoglobin	13	in vitro study	74	methionine	11
fish oil	10	histology	18	in-vitro	33	metronidazole	12
flatulence	12	histopathology	26	intestinal barrier	12	microbial activity	20
folic acid	18	homeostasis	47	intestinal flora	13	microbial community	143
follow up	26	human cell	32	intestinal health	26	microbial diversity	105
food allergy	13	icosapentaenoic acid	11	intestinal healths	16	microbial interaction	10
food composition	10	ileum	15	intestinal microbiota	41	microbial metabolism	30
galactose oligosaccharide	52	immune response	125	inulin	151	microbiology	147
gastrointestinal disease	32	immunity	83	isolation and purification	25	microbiome	184
gastrointestinal symptom	22	immunocompetent cell	16	lactic acid	45	microbiota	236
gastrointestinal tract function	11	immunoglobulin a	28	lactic acid bacteria	31	microflora	143
gestational age	12	immunoglobulin enhancer binding protein	27	lactococcus lactis	10	mouth flora	11
glucagon like peptide 1	20	immunoglobulin g	14	lactose	21	mucin	15
gut dysbiosis	15	immunoglobulin m	9	lignin	9	neomycin	10
gut-brain axis	14	immunohistochemistry	12	mammals	54	neoplasm	20
gut–brain axis	9	immunological tolerance	12	mannose	15	neoplasms	19
healthy diet	11	immunomodulation	83	meta-analysis	11	normal human	28
herbaceous agent	18	immunoregulation	21	metabolism	302	operational taxonomic unit	10
high fiber diet	12	immunostimulation	12	metabolites	83	parabacteroides	15
human	744	in vivo study	32	microalgae	12	phenylalanine	10
human milk	12	infectious agent	10	microbial metabolites	11	phylogeny	10
human tissue	13	innate immunity	45	microbiotas	40	polymerase chain reaction	28
humans	531	interleukin 1	11	microencapsulation	17	population abundance	29
hydrocortisone	14	interleukin 10	56	microorganisms	13	prevotella	48
hypertension	44	interleukin 17	24	molecular weight	35	prevotellaceae	10
immune system	80	interleukin 1beta	54	monosaccharide	19	principal component analysis	9
immunoglobulin	11	interleukin 2	16	monosaccharides	10	principal coordinate analysis	10
immunology	36	interleukin 4	17	nanoparticle	11	priority journal	23
incidence	17	interleukin 6	90	nanoparticles	10	procedures	26
infant	58	interleukin 8	23	nanotechnology	11	propionic acid	68
infant formula	23	intestinal mucosa	18	nutraceuticals	31	proteobacteria	76
infant, newborn	23	intestine	60	nutrients	17	pseudomonas aeruginosa	10
infection	13	intestine epithelium	13	nutrition	116	pyrosequencing	12
infection prevention	10	intestine epithelium cell	10	nutritional value	18	raffinose	12
inflammation	168	intestine mucosa	24	oligosaccharide	144	rna 16s	127
inflammatory bowel disease	75	intestines	34	oligosaccharides	115	rna sequencing	23
inflammatory bowel diseases	11	lactic acid bacterium	33	particle size	13	rna, ribosomal, 16s	41
intervention study	14	lamina propria	9	pathology	36	roseburia	22
intestine absorption	10	lipid composition	13	pectin	46	roseburia intestinalis	9
intestine mucosa permeability	26	lipid oxidation	12	peptide	11	ruminococcaceae	37
iron	15	lipid peroxidation	19	ph	54	ruminococcus	41
irritable bowel syndrome	14	lipopolysaccharide	40	phenol derivative	34	scfas	13
irritable colon	37	lipopolysaccharides	9	phenolic compounds	18	sequence analysis	11
kefir	10	livestock	10	phenols	25	short chain fatty acid	194
kidney	13	lysozyme	14	physical chemistry	25	skin flora	11
kidney disease	11	macrophage	14	physicochemical properties	25	soybean	12
lactation	18	malonaldehyde	22	physicochemical property	11	species composition	38
lactobacillus acidophilus	62	mannan	33	phytochemical	37	species diversity	11
lactobacillus casei	45	mannans	12	phytochemicals	19	staphylococcus	15
lactobacillus delbrueckii subsp. bulgaricus	15	meat	16	plant extracts	26	staphylococcus aureus	29
lactobacillus fermentum	17	messenger rna	19	plant leaf	12	streptococcus	30
lactobacillus paracasei	19	microbial colonization	11	plants (botany)	18	streptococcus mutans	10
lactobacillus plantarum	64	monocyte chemotactic protein 1	12	polymer	10	synergistic effect	14
lactobacillus rhamnosus	71	morbidity	12	polymerization	13	taxonomy	12
lactoferrin	15	mortality	25	polyphenol	78	tyrosine	10
lifestyle	18	mrna expression level	16	polyphenol derivative	11	ultra performance liquid chromatography	13
lifestyle modification	11	mucin 2	10	polyphenols	57	unclassified drug	166
liver cirrhosis	10	mucosal immunity	11	polysaccharide	124	vagina flora	16
low drug dose	13	natural killer cell	12	polysaccharides	132	vaginal delivery	10
magnesium	12	nitric oxide	15	postbiotic	17	valine	9
major clinical study	43	nitrogen	9	postbiotics	32	vancomycin	17
major depression	13	nonhuman	678	prebiotic	228	veillonella	12
malignant neoplasm	22	nutrient	25	prebiotic activity	11	verrucomicrobia	27
malnutrition	12	occludin	24	prebiotic effect	31
maltodextrin	31	oxidative stress	98	prebiotics	715
maternal nutrition	12	pathogen associated molecular pattern	9	probiotic	110
mediterranean diet	23	performance	18	probiotic bacteria	10
medline	18	peroxisome proliferator activated receptor gamma	11	probiotics	498
melatonin	12	phage therapy	15	property	18
mental disease	23	phagocytosis	12	proteins	17
mental health	37	phenotype	19	resistant starch	46
mental stress	9	pig	31	rhamnose	11
meta analysis	35	piglet	11	rna	15
meta analysis (topic)	13	plant extract	50	saccharomyces boulardii	10
microbial products not classified elsewhere	11	poultry	45	safety	10
microglia	10	protein	32	scfa	20
microorganism	28	protein expression	40	seaweed	27
microrna	11	protein synthesis	12	short chain fatty acids	20
middle aged	30	protein zo1	16	short-chain fatty acid	25
milk	31	quantitative analysis	9	short-chain fatty acids	68
milk, human	24	reactive oxygen metabolite	35	shorter chains	31
mineral	23	real time polymerase chain reaction	45	spray drying	11
multiple sclerosis	11	regulatory t lymphocyte	30	starch	43
natural product	11	rna extraction	12	structure analysis	10
necrotizing enterocolitis	11	saccharomyces cerevisiae	25	sucrose	21
nerve cell plasticity	10	salmonella	14	sugars	11
nervous system inflammation	23	saponin	17	sulfur compounds	10
neurologic disease	13	shannon index	11	sweetening agent	10
neuroprotection	18	signal transduction	43	synbiotic	65
neurotransmitter	14	skin	10	synbiotics	141
newborn	33	small intestine	12	tea	11
noradrenalin	11	sodium chloride	11	temperature	17
nutraceutical	37	superoxide dismutase	30	toxicity	10
nutrition supplement	11	survival rate	14	vitro fermentation	12
nutritional assessment	12	swine	20	volatile fatty acid	81
nutritional status	19	t lymphocyte	11	volatile fatty acids	18
omega 3 fatty acid	43	tannin	11	water	17
osteoporosis	13	th17 cell	16	xylan	14
outcome assessment	37	thiamine	10	xylooligosaccharide	16
pandemic	10	toll like receptor	16	xylooligosaccharides	10
parkinson disease	22	toll like receptor 2	11	xylose	14
pathogenesis	32	toll like receptor 4	34	yeast	23
pathophysiology	24	transcriptome	17	β-glucan	12
personalized medicine	14	transcriptomics	15
physical activity	36	tumor microenvironment	13
physiological stress	21	tumor necrosis factor	102
physiology	100	upregulation	40
pilot study	19	urea nitrogen blood level	11
placebo	45	veterinary medicine	50
polyunsaturated fatty acid	18	virulence factor	10
postbiotic agent	11	weaning	17
powder	14	western blotting	9
practice guideline	11	whey protein	10
prebiotic agent	828	zinc	26
preferred reporting items for systematic reviews and meta-analyses	10
pregnancy	36
prevalence	41
probiotic agent	536
prospective studies	10
prospective study	19
protein intake	17
public health	12
quality control	23
quality of life	47
quercetin	23
questionnaire	32
randomized controlled trial	67
randomized controlled trial (topic)	64
randomized controlled trials as topic	27
resveratrol	24
retinol	15
review	402
risk assessment	22
risk factor	50
risk factors	10
risk reduction	14
sars-cov-2	18
saturated fatty acid	9
schizophrenia	10
selenium	27
sepsis	10
serotonin	12
sleep	10
streptococcus thermophilus	28
supplementation	36
synbiotic agent	164
systematic review	93
therapy	10
therapy effect	19
trace element	18
traditional medicine	11
treatment	11
treatment duration	13
treatment outcome	20
tryptophan	24
ulcerative colitis	34
unsaturated fatty acid	10
uric acid	10
vaccination	16
vegetable	18
vitamin	35
vitamin d	47
vitamin supplementation	12
vitamins	22
yoghurt	19
yogurt	12
young adult	19
